# Supplementary material for: Ex Vivo and In Vitro Studies Revealed Underlying Mechanisms of Immature Intestinal Inflammatory Responses Caused by Aflatoxin M1 Together with Ochratoxin A
Source: MDPI journal article supplement (doi:10.3390/toxins14030173), 2022-02-25
Supplement: s1 [file s1]

# Supplementary Materials: Ex Vivo and In Vitro Studies Revealed Underlying Mechanisms of Immature Intestinal Inflammatory Responses Caused by Aflatoxin M1 Together with Ochratoxin A

Zi-Wei Wang, Ya-Nan Gao, Sheng-Nan Huang, Jia-Qi Wang and Nan Zheng

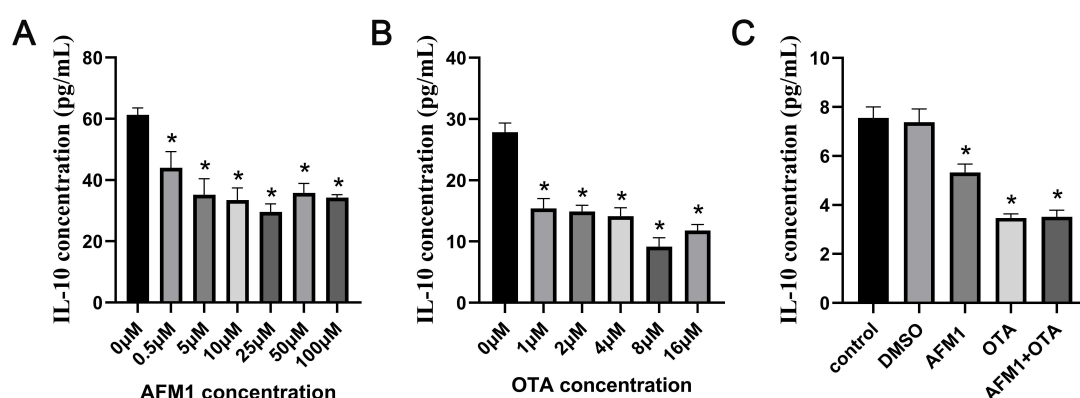

**Figure S1.** Effects of (A) various doses of AFM1, (B) various doses OTA and (C) AFM1+OTA treatment for 24h on the release of IL-10 from the isolated jejunal tissues. In panel C, the concentration of AFM1 and OTA was 50 μM and 4 μM, respectively. Results were shown as mean ± SEM ( $n \geq 6$ ). \*  $p < 0.05$  statistically significantly compared with control.

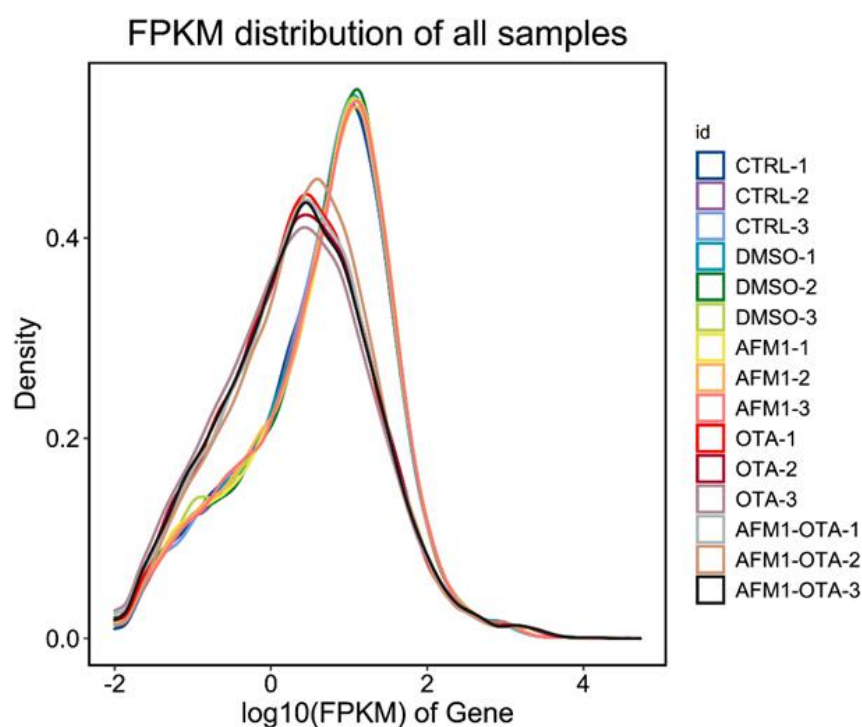

**Figure S2.** FPKM distribution of all samples.

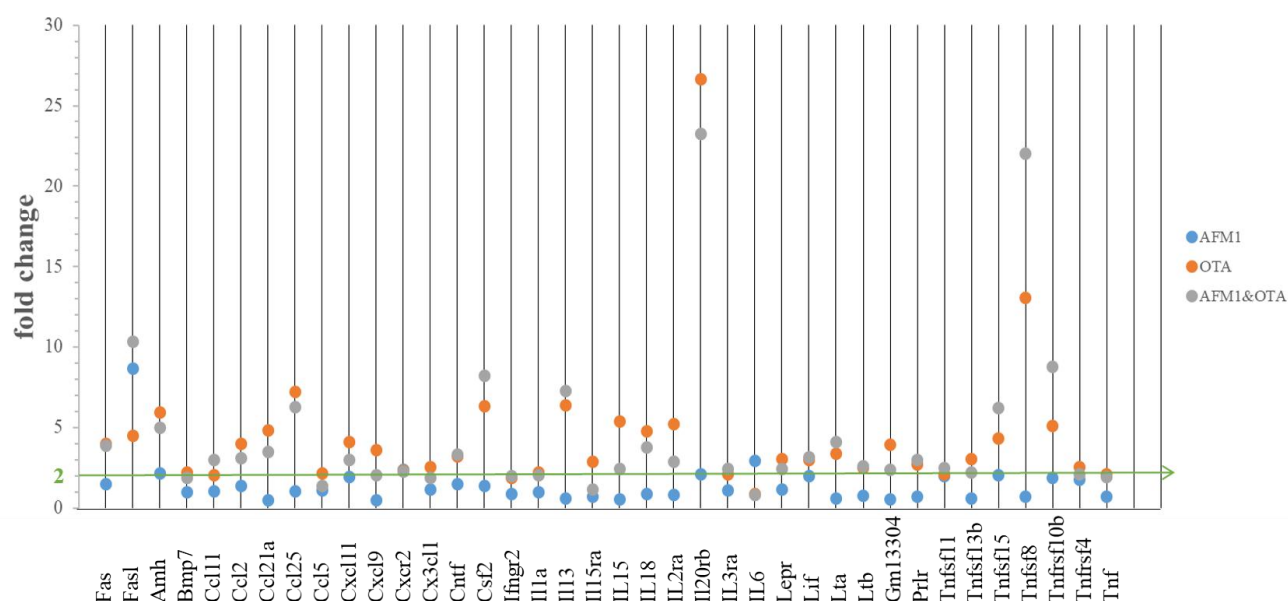

**Figure S3.** Relative expression of each gene (vs. DMSO group) involved in block 1 'Cytokine-Cytokine receptor interaction' pathway.

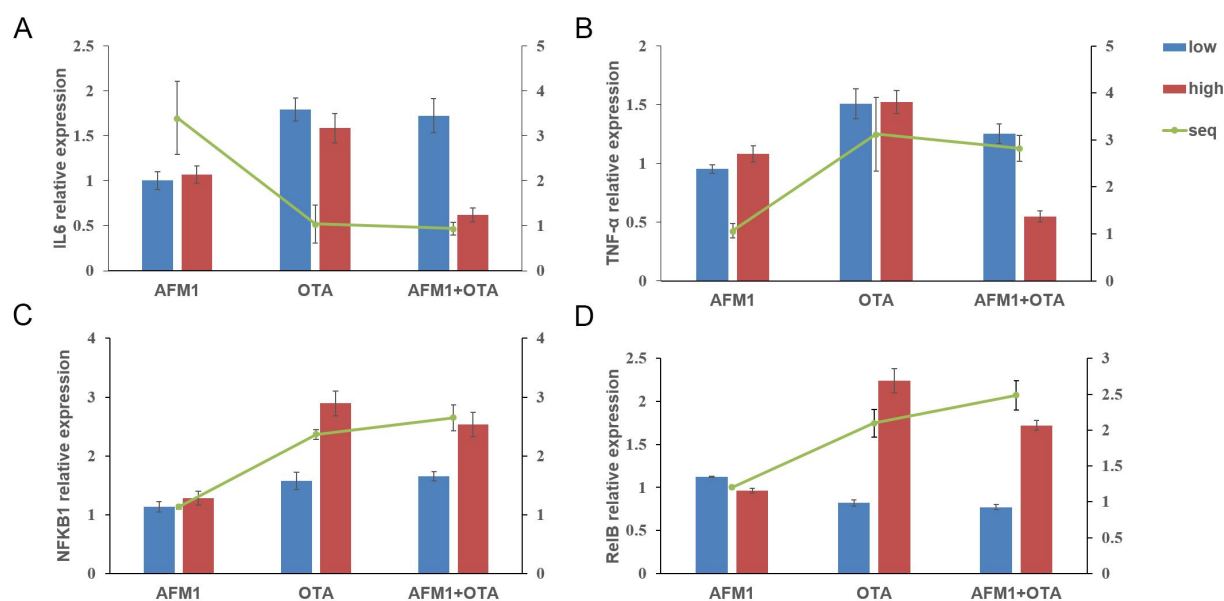

**Figure S4.** Relative gene expression (vs. DMSO group) of (A) *IL6* (B) *TNF-α* (C) *NFKB1* and (D) *RelB* using qPCR assay in FHs 74 Int cells and RNA-seq method in jejunal tissues of fetal mice. Blue bar and red bar represent the qPCR-data from toxin groups at low and high concentration, respectively (AFM1 low: 12.5  $\mu$ M, AFM1 high: 50  $\mu$ M; OTA low: 0.01  $\mu$ M; OTA high: 2  $\mu$ M). Green fold line represents the data from RNA-seq.

**Table S1.** List of primer sequence for Real-Time qPCR.

| Gene                     |   | Sequence (5' to 3')     |
|--------------------------|---|-------------------------|
| GAPDH<br>(human)         | F | GCAAGAGCACAAGAGGAAGAG   |
|                          | R | TCTACATGGCAACTGTGAGGA   |
| IL-6<br>(human)          | F | CCTTCCAAAGATGGCTGAAA    |
|                          | R | CAGGGGTGGTTATTGCATCT    |
| TNF- $\alpha$<br>(human) | F | CTGAACCTCGGGGTGATCG     |
|                          | R | GCTTGGTGGTTTGCTACGAC    |
| NFKB1<br>(human)         | F | AACAGAGAGGATTTCGTTTCCG  |
|                          | R | TTTGACCTGAGGGTAAGACTTCT |
| RelB<br>(human)          | F | CATTGAGCGGAAGATTCAAC    |
|                          | R | GCAGCTCTGATGTGTTTGTG    |

**Table S2.** List of several genes adjacent to NFKB1.

| Gene name | Protein description                                                                                                                                                                                                                                                                                                           | Fold change vs. DMSO group |                   |                    |                   |
|-----------|-------------------------------------------------------------------------------------------------------------------------------------------------------------------------------------------------------------------------------------------------------------------------------------------------------------------------------|----------------------------|-------------------|--------------------|-------------------|
|           |                                                                                                                                                                                                                                                                                                                               | DMSO                       | AFM1              | OTA                | AFM1+OTA          |
| Nlrp3     | NLR family, pyrin domain containing 3; the sensor component of the inflammasome, plays a crucial role in innate immunity and inflammation                                                                                                                                                                                     | 1.00 <sup>b</sup>          | 3.16 <sup>b</sup> | 4.98 <sup>ab</sup> | 7.54 <sup>a</sup> |
| Pycard    | PYD and CARD domain containing; Functions as key mediator in apoptosis and inflammation; Required for recruitment of caspase-1 to inflammasomes containing certain pattern recognition receptors, e.g., Nlrp3                                                                                                                 | 1.00 <sup>b</sup>          | 0.83 <sup>b</sup> | 3.28 <sup>a</sup>  | 3.86 <sup>a</sup> |
| Casp1     | Besides apoptotic regulation, also plays a key role in cell immunity as an inflammatory response initiator: once activated through formation of an inflammasome complex, it initiates a proinflammatory response through the cleavage of the two inflammatory cytokines pro-IL1B and pro-IL18, releasing the mature cytokines | 1.00                       | 0.73              | 2.23               | 2.16              |
| Il1b      | interleukin 1 beta                                                                                                                                                                                                                                                                                                            | 1.00 <sup>b</sup>          | 8.27 <sup>a</sup> | 0.68 <sup>b</sup>  | 0.18 <sup>b</sup> |
| Il1a      | interleukin 1 alpha                                                                                                                                                                                                                                                                                                           | 1.00                       | 0.98              | 2.22               | 2.07              |
| Il18      | interleukin 18                                                                                                                                                                                                                                                                                                                | 1.00 <sup>b</sup>          | 0.88 <sup>b</sup> | 4.77 <sup>a</sup>  | 3.79 <sup>a</sup> |
| Tnf       | tumor necrosis factor                                                                                                                                                                                                                                                                                                         | 1.00                       | 0.73              | 2.13               | 1.93              |

Note: Different lowercase indicates statistical differences between groups ( $p < 0.05$ ).
